# Supplementary material for: Are fermentation products promising feedstock for high-density bio-fuel? domino reactions for upgrading aqueous acetone–butanol–ethanol mixtures
Source: Royal Society of Chemistry journal article supplement (doi:10.1039/d0gc02331k), 2020-01-01
Supplement: d0gc02331k1.pdf [file d0gc02331k1.pdf]

### Supporting Information

**Title:** Are Fermentation Products Promising Feedstock for High-Density Bio-Fuel? Domino Reactions for Upgrading Aqueous Acetone–Butanol–Ethanol Mixtures

Yahui Gong<sup>a</sup>, Pingzhou Wang<sup>a</sup>, Cai Wu<sup>a</sup>, Jie Wang<sup>a</sup>, Chun Shen<sup>a,b,\*</sup>

<sup>a</sup>Beijing Key Laboratory of Bioprocess, National Energy R&D Center for Biorefinery, College of Life Science and Technology, Beijing University of Chemical Technology, No. 15 of North Three-Ring East Road, Chaoyang District, Beijing 100029, P.R. China

<sup>b</sup>The State Key Laboratory of Chemical Engineering, Department of Chemical Engineering, Tsinghua University, Beijing 100084, P.R. China

### Materials and chemicals:

Polyethylene-polypropylene glycol (F127), Tetraethyl orthosilicate (TEOS) were purchased from Energy Chemical Co.  $\text{Mg}(\text{NO}_3)_2 \cdot 6\text{H}_2\text{O}$ ,  $\text{Ni}(\text{NO}_3)_2 \cdot 6\text{H}_2\text{O}$  were purchased from Sigma-Aldrich Co. Mg-Al hydrotalcite,  $\gamma\text{-Al}_2\text{O}_3$  were purchased from J&K Chemical Co. Acetone (99.9%), 1-butanol (99.9%) and ethanol (99.9%) were purchased from Fisher Chemical Co., J&K Chemical Co., and Shanghai Macklin Biochemical Co., respectively. Toluene (99.9%) and *n*-heptane (99.5%) were purchased from Shanghai Macklin Biochemical Co. The proportions of each substance in the mimic ABE mixtures are shown in Table S1.

**Table S1.** Detailed compositions of aqueous ABE mixtures with different water content.

| Ethanol<br>(g) | Acetone<br>(g) | Butanol<br>(g) | Water<br>(g) | Water content<br>(%) |
|----------------|----------------|----------------|--------------|----------------------|
| 0.27           | 3.38           | 5.37           | 0.98         | 9.8                  |
| 0.22           | 3.24           | 5.34           | 1.21         | 12.1                 |
| 0.28           | 3.28           | 4.86           | 1.58         | 15.8                 |
| 3.89           | 4.90           | 0.00           | 1.21         | 12.1                 |

### Catalyst preparation:

Synthesis of SBA-16: In a 120 mL glass vessel, 2 g of F127, 78 mL of water and 3.3 mL of HCl (10 M) were added. After completely dissolved, 9 mL TEOS was injected to the mixture. Stirring at 40 °C for 20 h, it was moved into a Teflon lining for hydrothermal reaction at 220 °C for 24 h. After being filtered and dried, the product was calcined at 550 °C.

Synthesis of Ni–MgO–SBA-16 with different loading amount of Ni: The catalyst was prepared by impregnation method. In a typical synthetic route, certain amount of  $\text{Ni}(\text{NO}_3)_2 \cdot 6\text{H}_2\text{O}$  and  $\text{Mg}(\text{NO}_3)_2 \cdot 6\text{H}_2\text{O}$  were dissolved in 100 mL of water under stirring at room temperature, and 3 g of SBA-16 was added to the aqueous solution subsequently. The mixture was thoroughly evaporated under intensely stirring at 80 °C, and then the sample was reduced by  $\text{H}_2$  for 3 h at 550 °C after calcination at 550 °C for 3 h.

### **Characterizations:**

XRD analysis was carried out using a Shimadzu XRD-6100 diffractometer with Cu K $\alpha$  radiation (60 kV, 50 mA). The 2-theta value was scanned in the range of  $5^\circ \leq 2\theta \leq 80^\circ$ .

The morphology of the samples (SEM) was observed via ZEISS SUPRA55. The structure, size, and lattice fringes of the samples were examined using HRTEM (JEOL JEM-2011), equipped with an energy-dispersive X-ray spectroscopy (EDS) detector.

The specific surface area was measured using Beishide Instrument 3H-2000PS2 1 by the Brunauer–Emmett–Teller (BET) method based on the N<sub>2</sub> adsorption isotherms. All samples were degassed at 180 °C for 12 h before measurements.

The acidic and basic properties of catalysts were determined using NH<sub>3</sub>-TPD and CO<sub>2</sub>-TPD, respectively, equipped with a thermal conductivity detector (TCD). The sample (0.1 g) was pretreated in a glass U-tube under He flow (25 mL/min) at 500 °C for 1 h, and then cooled to room temperature. Until the sample was completely degassed, absorption gas was switched to CO<sub>2</sub> or NH<sub>3</sub> to sweep the U-tube for 30 min at room temperature. Then under an atmosphere of pure He, the temperature was increased with a heating rate of 10 °C/min from 100 to 900 °C, recording TCD signals. The surface area and content of Ni was calculated via H<sub>2</sub>-TPD. The operation process was the same as CO<sub>2</sub>- or NH<sub>3</sub>-TPD except that there is a reduction process at the very beginning and hydrogen is used as the adsorbed gas.

Differential scanning calorimetry (DSC) was performed on a NETZSCH DSC 214 Polyma differential scanning calorimeter using Concavus Pan Al with a nitrogen flow of 40 or 60 mL/min. High purity indium was used to calibrate the calorimeter. Sample sizes were between 30–40 mg and the samples were ramped from -150 °C to 25 °C, down to -150 °C and then back to 25 °C, all at 5 °C /min. The energy density was determined by standard bomb calorimetry methods using KD ZDHW-8A oxygen bomb calorimeter.

### **Activity tests:**

A mixture of acetone, *n*-butanol, and ethanol with water were used as the model ABE fermentation. In a typical reaction process, 1 g of the as-prepared catalyst, 10 g of the ABE mixtures and certain amount of internal standard were added into the reactor. Then the reactor was purged with nitrogen gas three times and then heated to 240 °C with a stirring speed of 600 rpm for 24 h. Afterwards, the reactor was cooled to room temperature by an ice-water bath.

The trimer condensation of methyl ketones was conducted in a 50 mL sealed stainless-steel autoclave or a Dean-Stark apparatus. In a typical reaction process, 1 g of the solid base catalyst, 1 g anhydrous CaCl<sub>2</sub>, 1.5 g of the methyl ketone, 20 g heptane and certain amount of internal standard were added into the reactor. Then the reactor was purged with nitrogen gas three times and then heated to 180 °C with a stirring speed of 600 rpm for 2 h.

The HDO of the as-prepared products was conducted in a 50 mL sealed stainless-steel autoclave. In a typical reaction process, oxygenates (0.4 g), 7 wt% Ni–MgSiO<sub>3</sub> catalyst (0.4 g), and cyclohexane (8 g) were transferred into the autoclave. The reactor was then sealed, purged with H<sub>2</sub> for three times and charged to 2.5 MPa H<sub>2</sub> pressure. The reaction was then carried out at 180 °C and 2.5 MPa under magnetic stirring for 12 h. After the reaction, the autoclave was quenched in an ice-water bath to room temperature.

All the reaction product was analyzed by internal standard method through Shimadzu GC-2014 Chromatograph, using dodecane as the internal standard.

#### **Parameter of Gas Chromatography (GC):**

The chromatographic column is HP-5 (30 m × 0.32 mm, d<sub>f</sub> = 0.5 μm). The oven temperature was maintained at 313 K for 2 min and then heated up to 493K at 5 K/min. Nitrogen with a flow rate of 180 mL min<sup>-1</sup> was used as the carrier gas. The flow rate of hydrogen gas and air was 40 and 400 mL min<sup>-1</sup>, respectively.

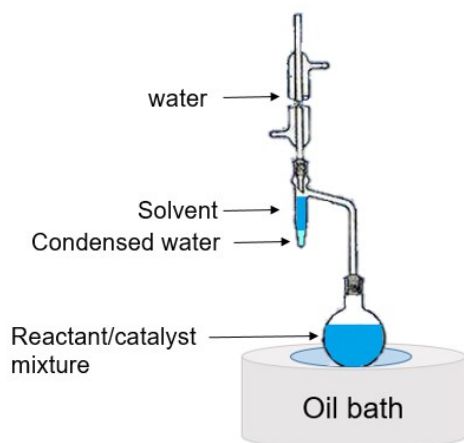

**Fig. S1.** Diagram of Dean Stark apparatus used in the several exploratory reactions.

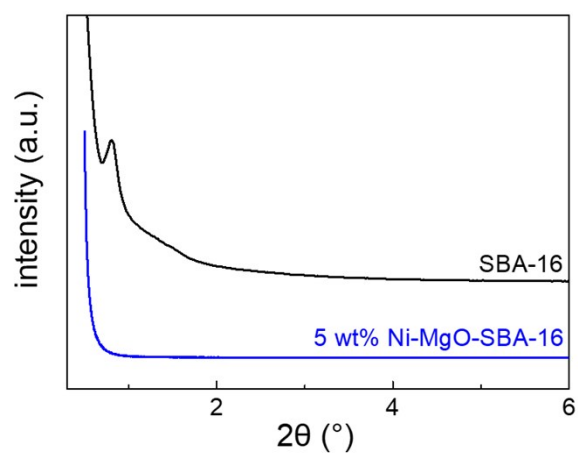

**Fig. S2.** Small-angle XRD patterns for SBA-16 and 5 wt% Ni–MgO–SBA-16.

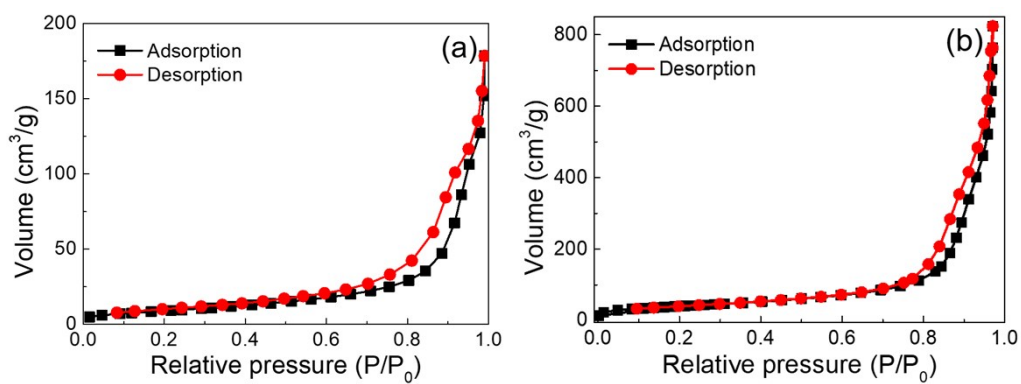

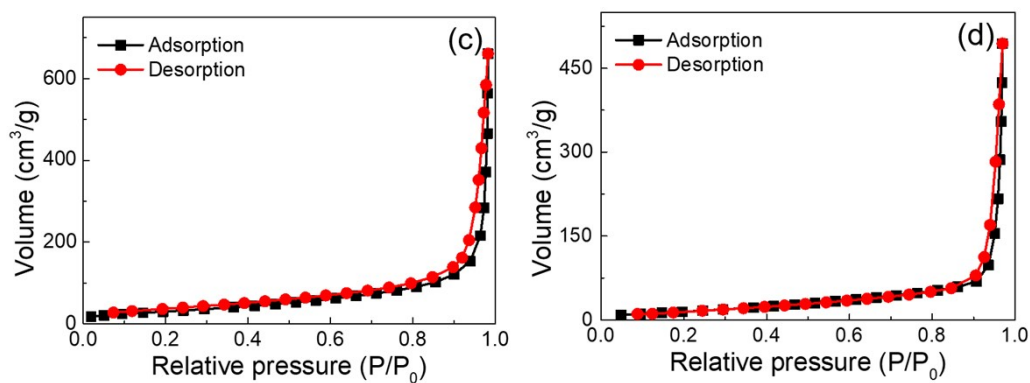

**Fig. S3.** N<sub>2</sub> adsorption/desorption isotherm of (a) 5 wt% Ni–MgO–SBA-16 catalyst, (b)  $\gamma$ -Al<sub>2</sub>O<sub>3</sub> catalyst, (c) MgAl-MMO catalyst and (d) MgO catalyst.

**Table S2.** BET surface areas of 5 wt% Ni–MgO–SBA-16 catalyst and the prepared catalysts used in step two.

| Catalyst                                 | Surface Area (m <sup>2</sup> /g) |
|------------------------------------------|----------------------------------|
| 5 wt% Ni–MgO–SBA-16                      | 34.2                             |
| $\gamma$ -Al <sub>2</sub> O <sub>3</sub> | 230.8                            |
| MgAl-MMO                                 | 192.6                            |
| MgO                                      | 178.4                            |

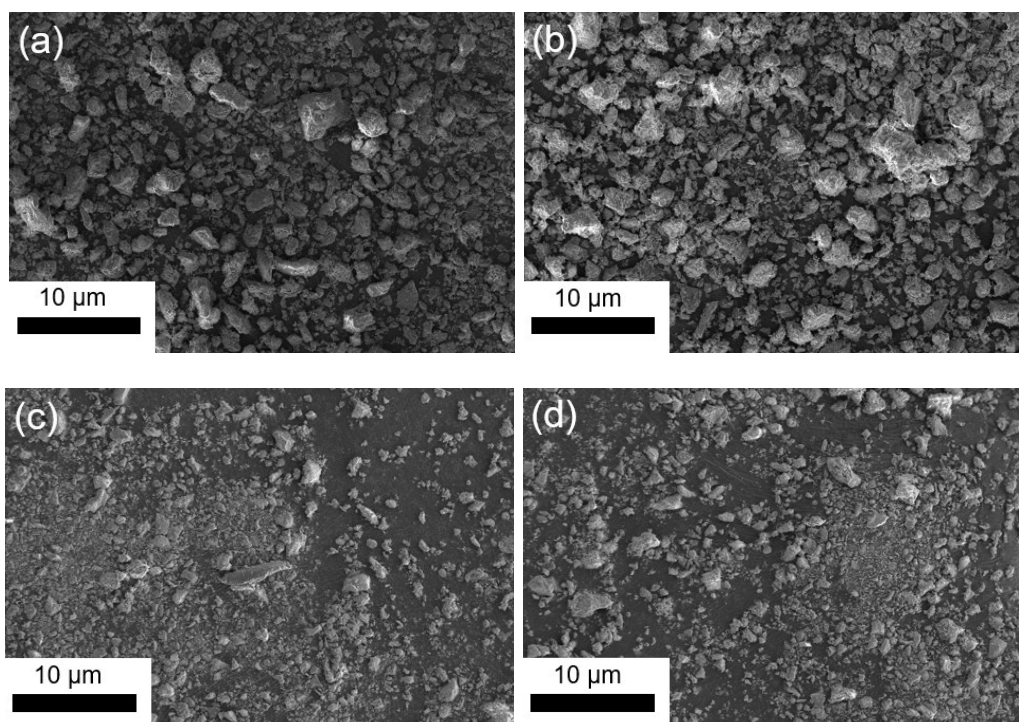

**Fig. S4.** SEM images of the (a) 2 wt% Ni–MgO–SBA-16 catalyst, (b) 5 wt% Ni–MgO–SBA-16 catalyst, (c) 7 wt% Ni–MgO–SBA-16 catalyst and (d) 10 wt% Ni–MgO–SBA-16 catalyst.

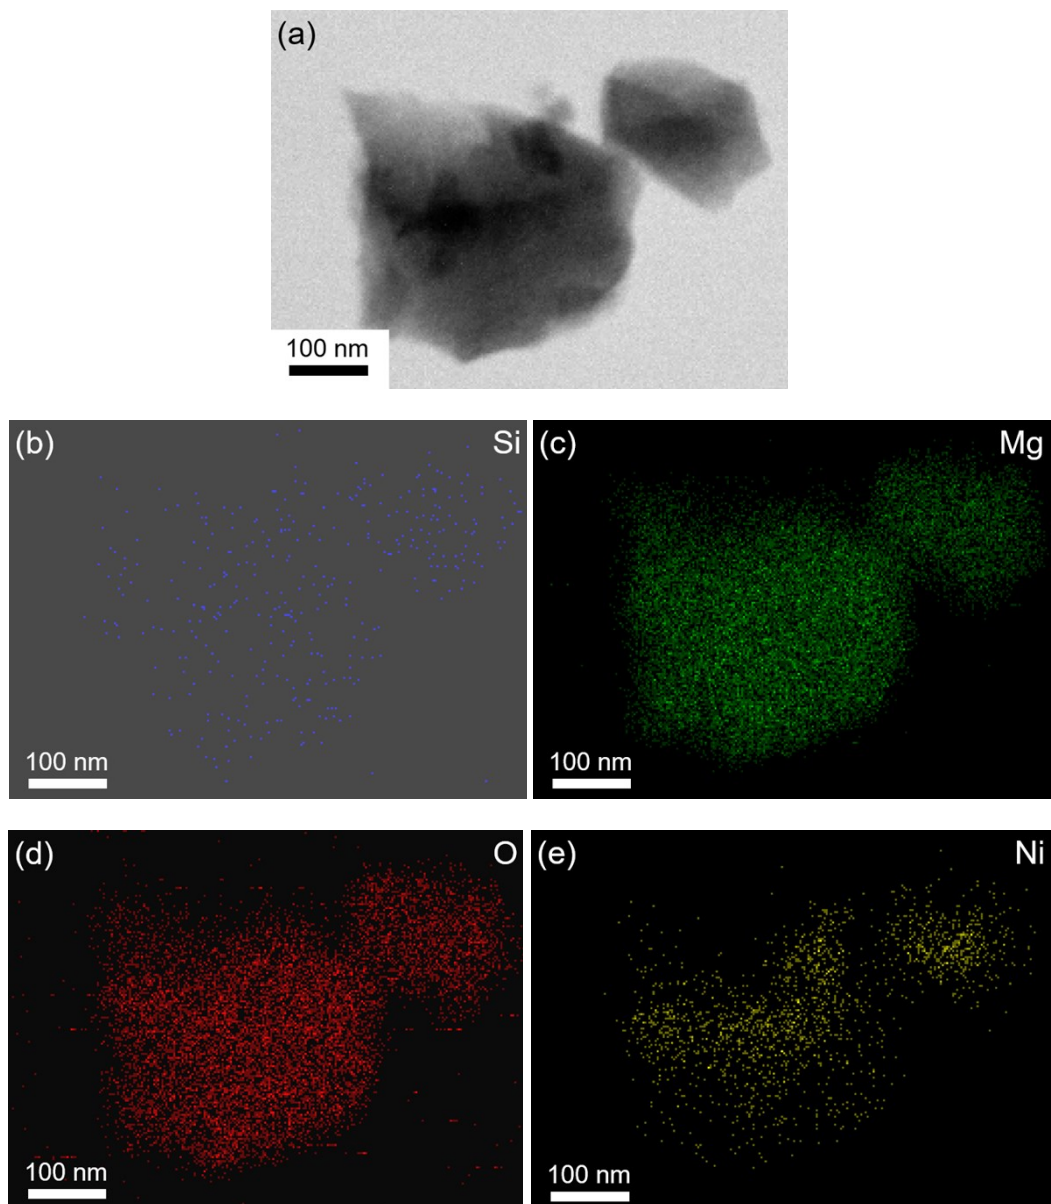

**Fig. S5.** (a) TEM images and (b–e) EDS mappings of the 2 wt% Ni–MgO–SBA-16 catalyst.

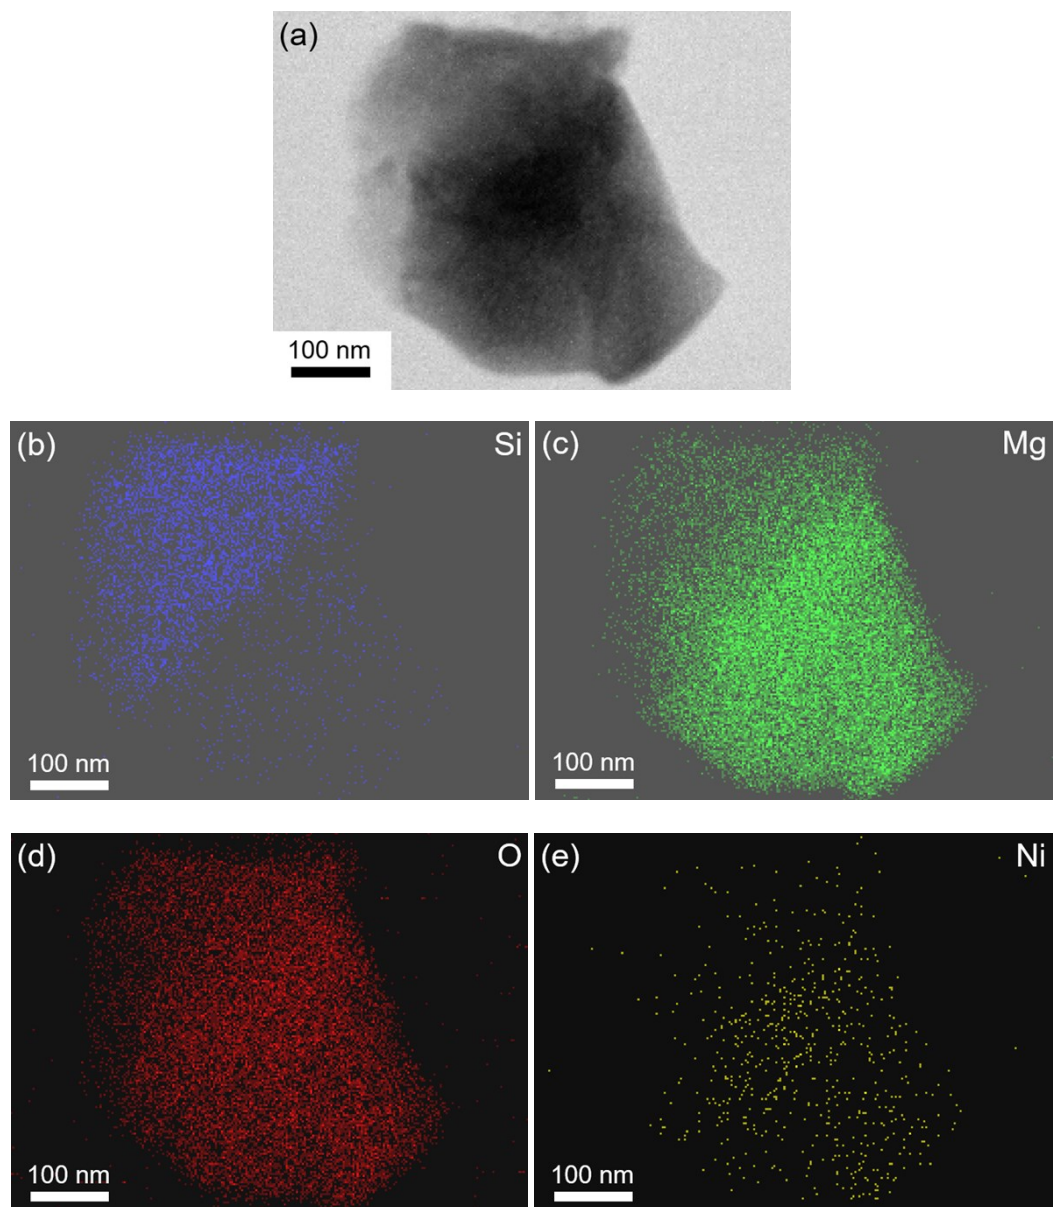

**Fig. S6.** (a) TEM images and (b–e) EDS mappings of the 7 wt% Ni–MgO–SBA-16 catalyst.

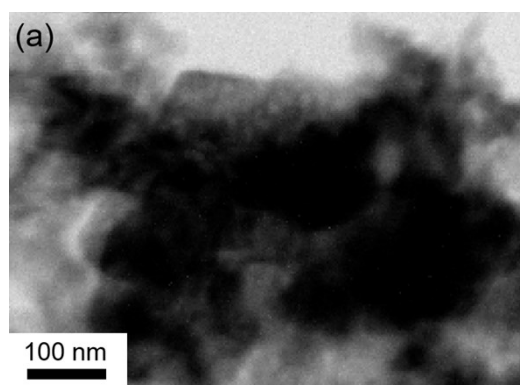



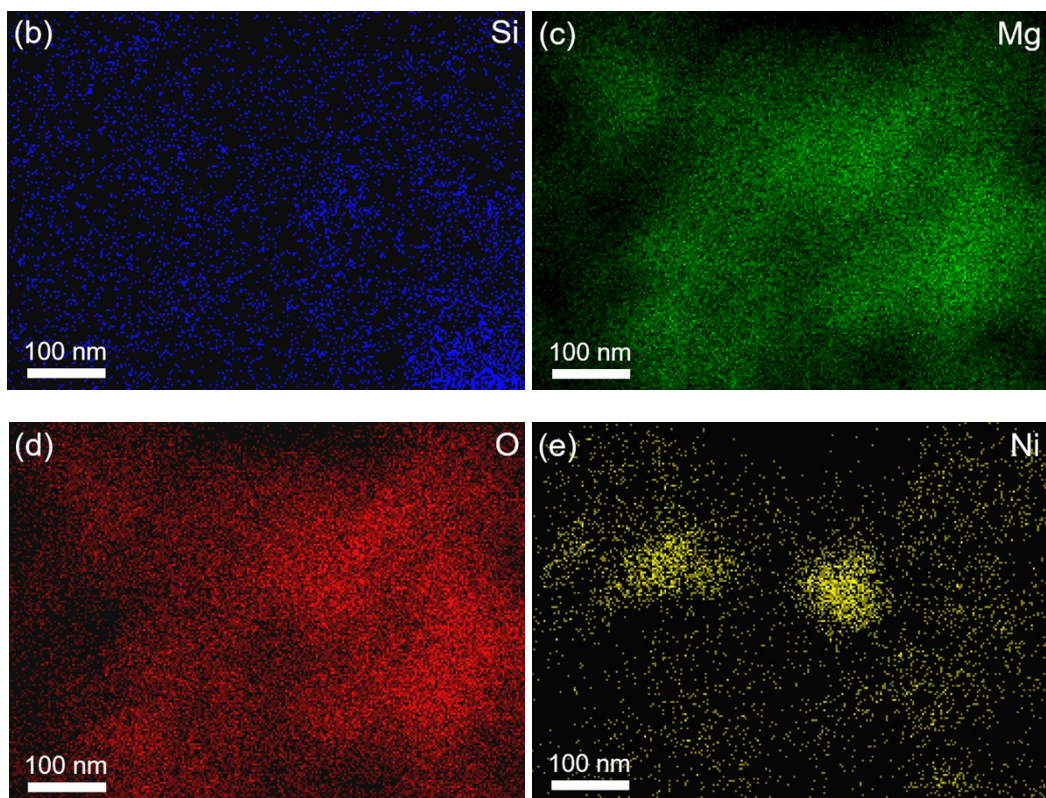

**Fig. S7.** (a) TEM images and (b–e) EDS mappings of the 10 wt% Ni–MgO–SBA-16 catalyst.

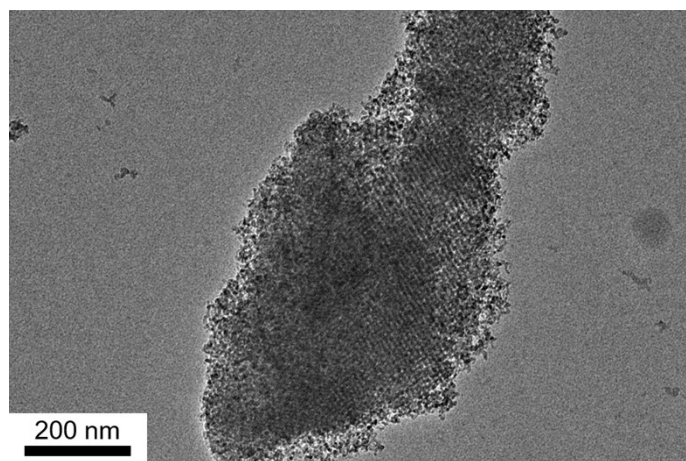

**Fig. S8.** The HR-TEM image of synthesized SBA-16.

**Table S3.** Effect of Ni loading amount on catalytic performance over Ni–MgO–SBA-16 catalysts. Reaction conditions: 12 wt% water containing ABE mixture (10 g), dodecane (1 g), Ni–MgO–SBA-16 catalyst (1 g), reaction temperature (240 °C), and 24 h.

| Ni loading amount<br>(wt %) | ABE conversion<br>(%) | Selectivity (%) |                      |                      |                       |                   |
|-----------------------------|-----------------------|-----------------|----------------------|----------------------|-----------------------|-------------------|
|                             |                       | Heptane         | 2-C <sub>5(=O)</sub> | 2-C <sub>7(=O)</sub> | 2-C <sub>7(-OH)</sub> | C <sub>8-15</sub> |
| 2                           | 16.8                  | 2.1             | 8.7                  | 55.9                 | 19.7                  | 7.7               |
| 5                           | 55                    | 5.4             | 4.7                  | 59.2                 | 11.2                  | 15                |
| 7                           | 57.2                  | 10.5            | 5.6                  | 56.4                 | 2.9                   | 15.9              |
| 10                          | 59.4                  | 46.3            | 3.5                  | 29.5                 | 9.7                   | 13.1              |

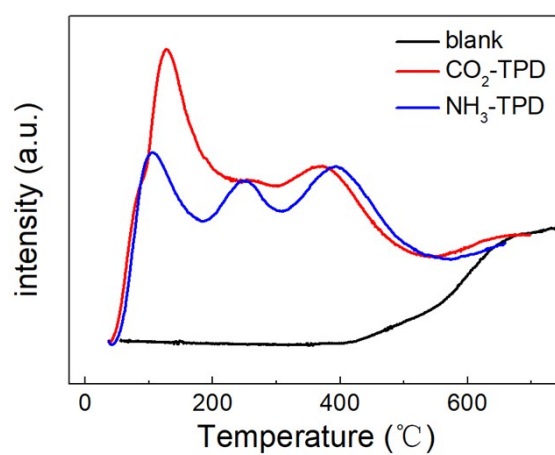

Fig. S9. CO<sub>2</sub> and NH<sub>3</sub>-TPD patterns of the  $\gamma$ -Al<sub>2</sub>O<sub>3</sub> catalyst.

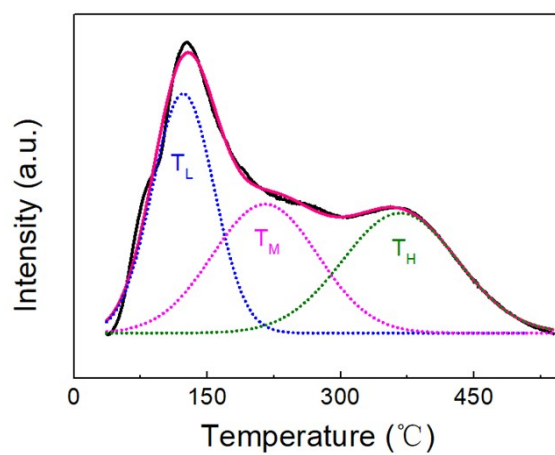

Fig. S10. CO<sub>2</sub>-TPD profiles of the  $\gamma$ -Al<sub>2</sub>O<sub>3</sub> catalyst.

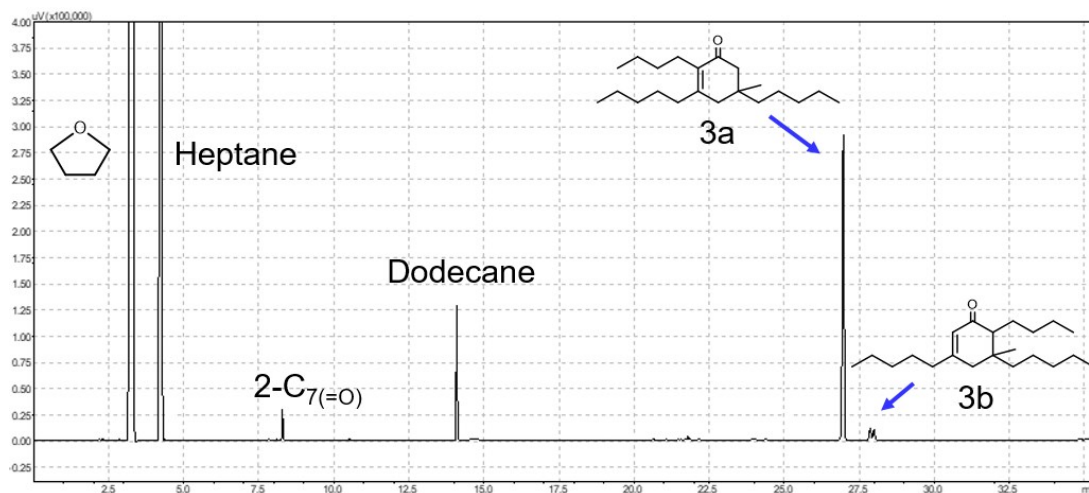

**Fig. S11.** GC trace of  $C_{21}$  oxygenates (3a and 3b) from trimer condensation of  $2-C_7(=O)$ .

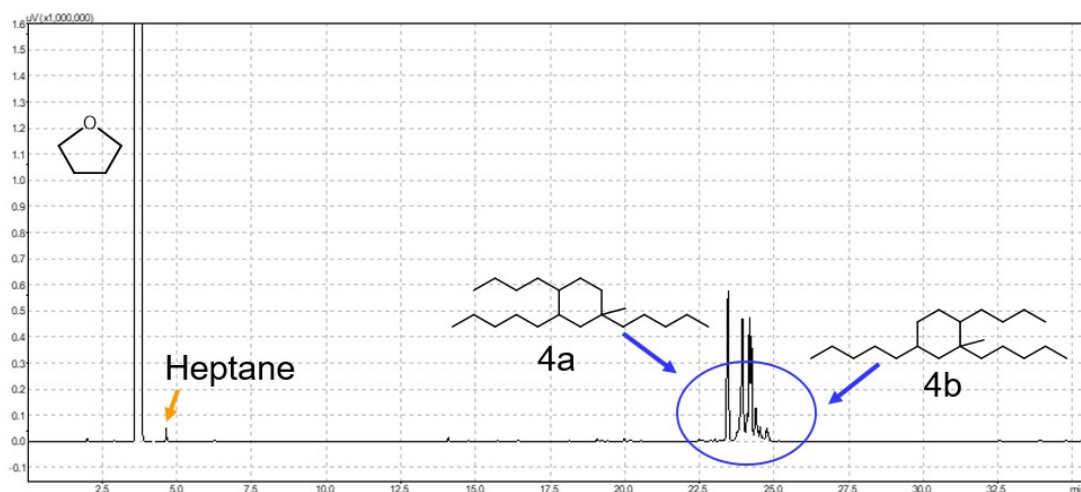

**Fig. S12.** GC trace of the HDO products  $C_{21}$  alkanes (4a and 4b).

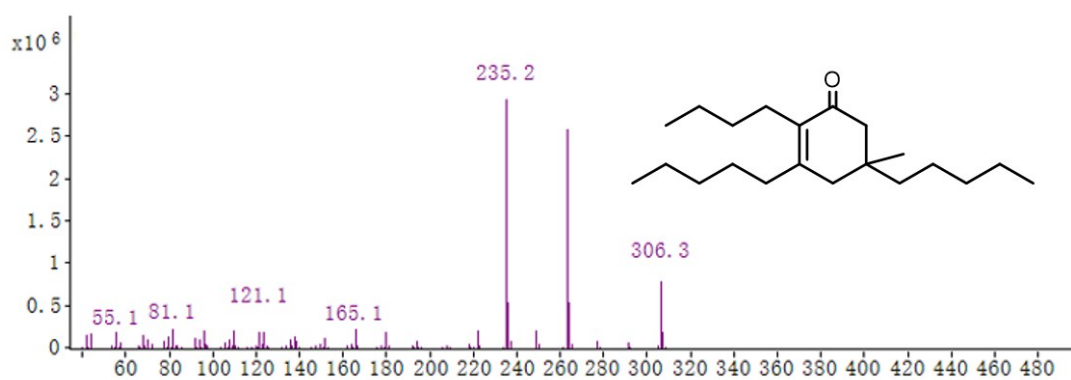

**Fig. S13.** Mass spectrum of  $C_{21}$  oxygenates (3a).

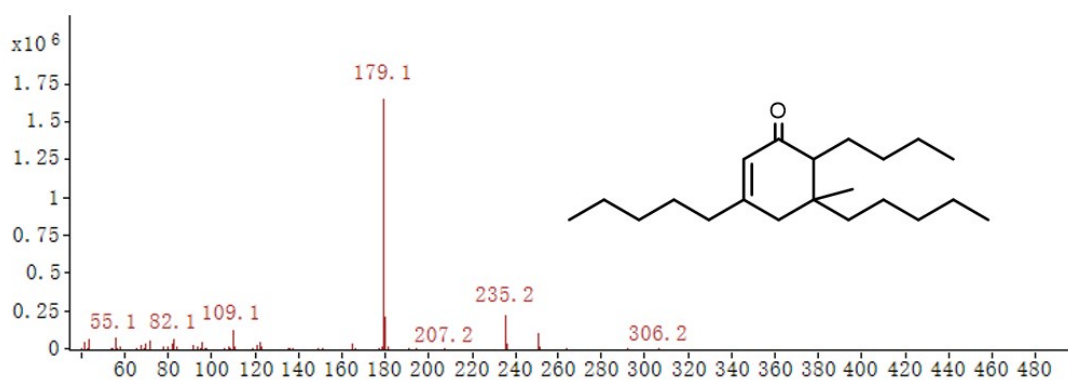

**Fig. S14.** Mass spectrum of C<sub>21</sub> oxygenates (3b).

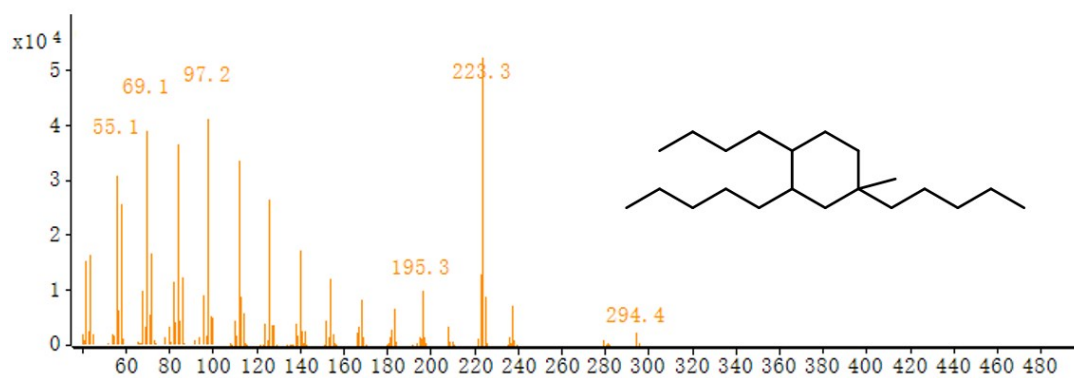

**Fig. S15.** Mass spectrum of C<sub>21</sub> alkanes (4a).

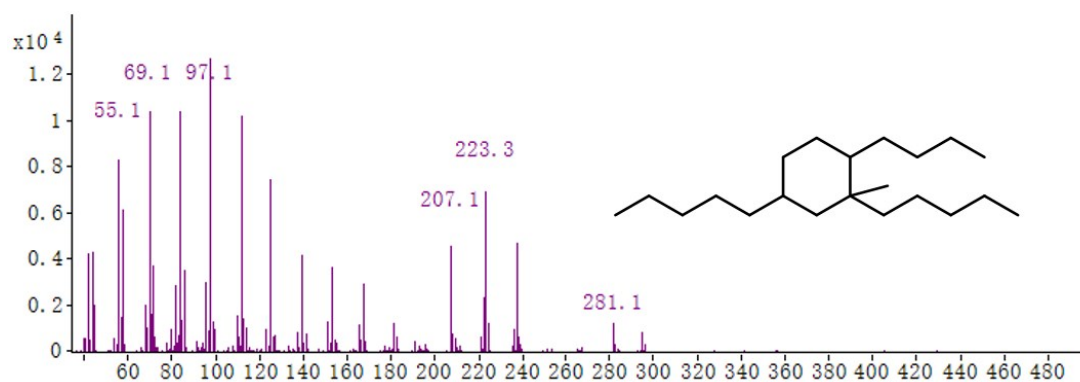

**Fig. S16.** Mass spectrum of C<sub>21</sub> alkanes (4b).

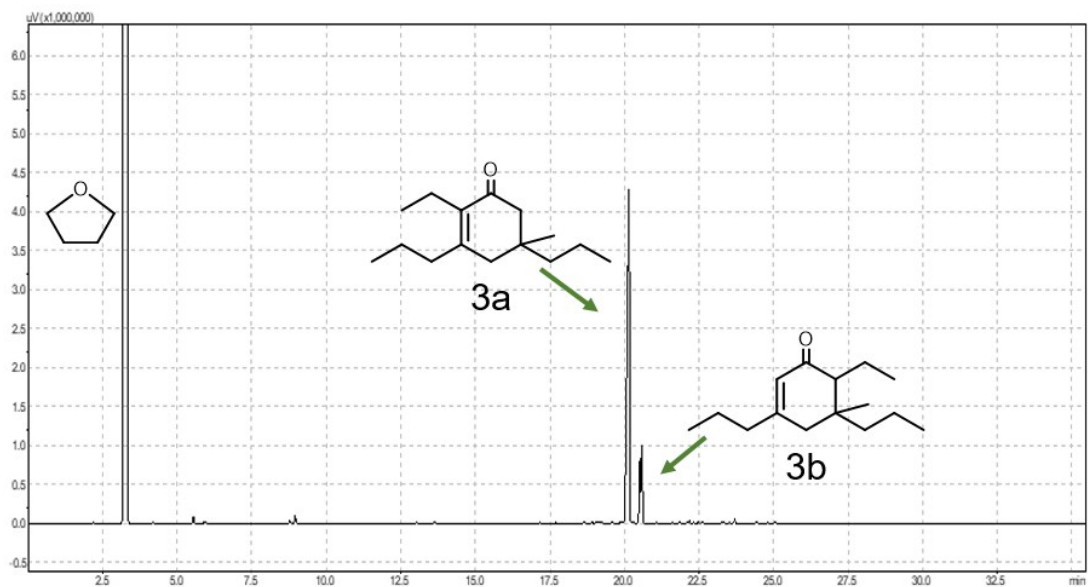

**Fig. S17.** GC trace of C<sub>15</sub> oxygenates (3a and 3b) from trimer condensation of 2-C<sub>5</sub>(=O).

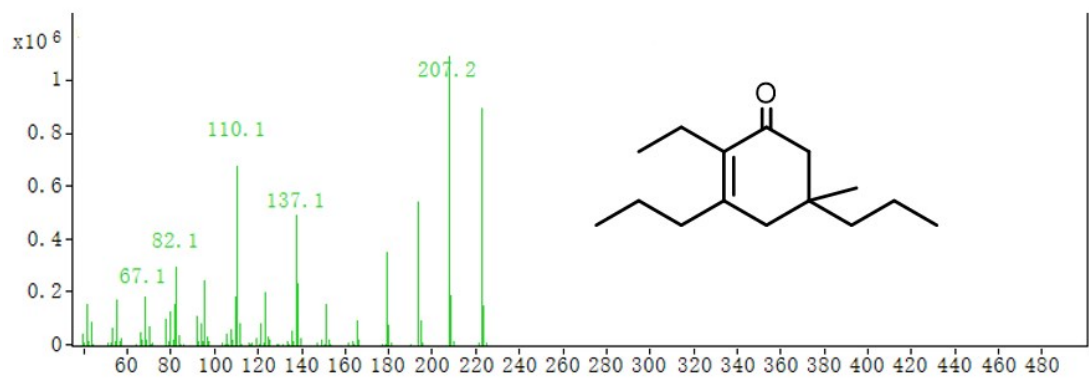

**Fig. S18.** Mass spectrum of C<sub>15</sub> oxygenates (3a)

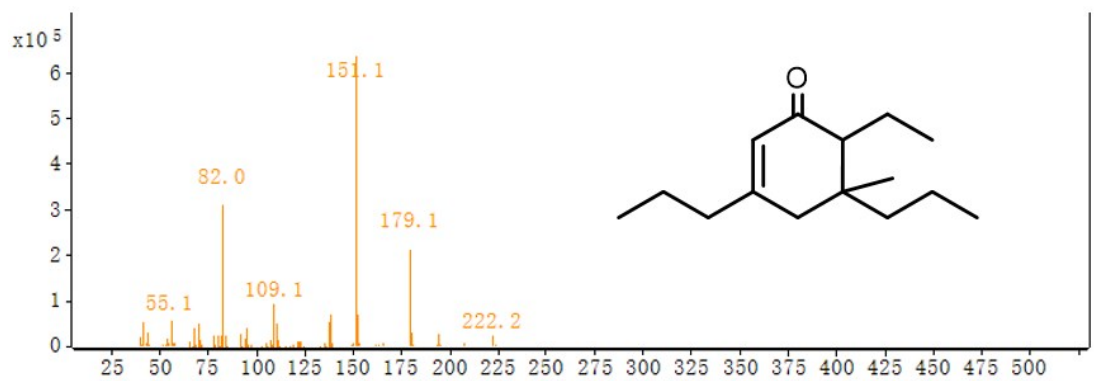

**Fig. S19.** Mass spectrum of C<sub>15</sub> oxygenates (3b).

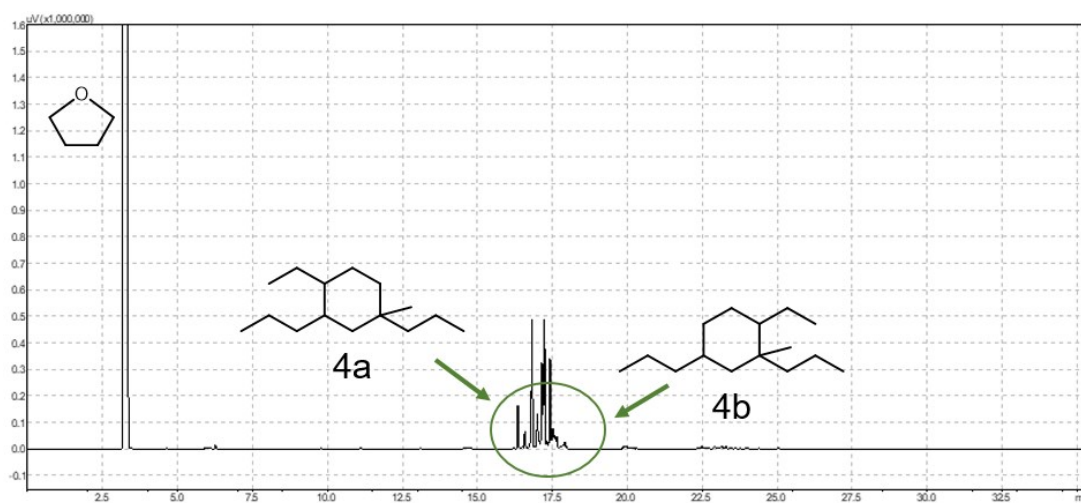

**Fig. S20.** GC trace of the HDO products C<sub>15</sub> alkanes (4a and 4b).

**Table S4.** The physical property data of several chemicals used in the first step (at normal temperatures and pressures).

| Chemicals   | Boiling point (K) | Density (g/cm <sup>3</sup> ) |
|-------------|-------------------|------------------------------|
| Acetone     | 329.4             | 0.78                         |
| Butanol     | 390.6             | 0.81                         |
| Ethanol     | 351.0             | 0.79                         |
| 2-Pentanone | 374~378           | 0.81                         |
| 2-Heptanone | 422~423           | 0.82                         |

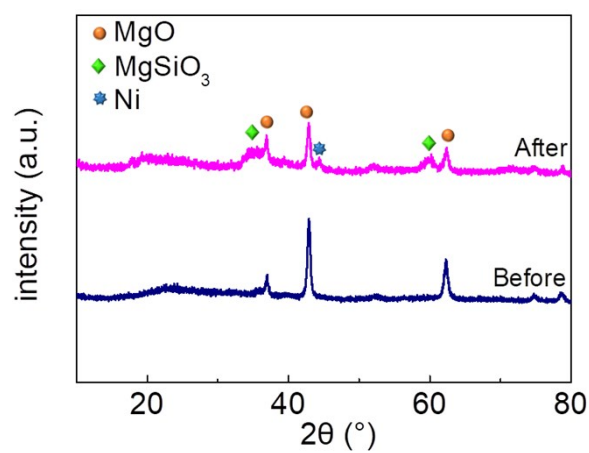

**Fig. 21.** XRD patterns of the 5 wt% Ni–MgO–SBA-16 catalyst before and after reaction with 12.1 wt% water content ABE mixtures.

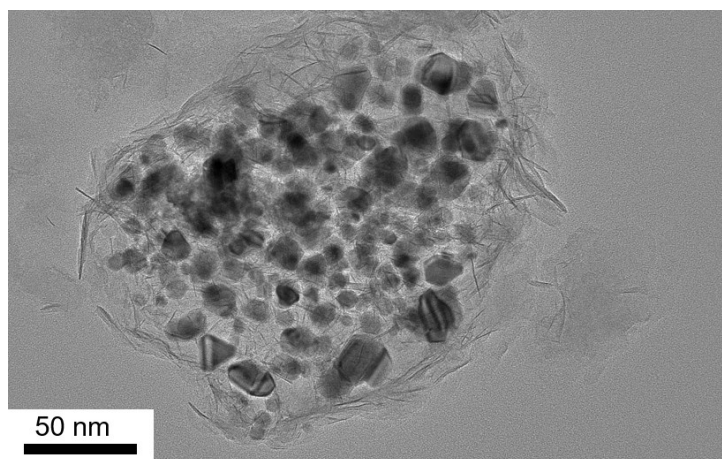

**Fig. S22.** The HR-TEM image of the spent 5 wt% Ni–MgO–SBA-16 catalyst.

**Table S5.** BET results of the initial and spent  $\gamma$ -Al<sub>2</sub>O<sub>3</sub> catalyst.

| Recycle times  | Surface area (m <sup>2</sup> /g) |
|----------------|----------------------------------|
| 0              | 230.8                            |
| 1              | 160.5                            |
| 2              | 143.6                            |
| 3              | 130.3                            |
| 5(calcination) | 219.7                            |

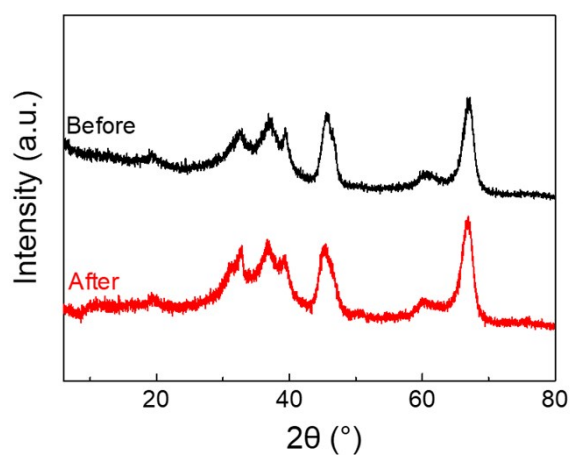

**Fig. S23.** XRD patterns of the  $\gamma$ -Al<sub>2</sub>O<sub>3</sub> catalysts before and after reaction with 2-heptanone.

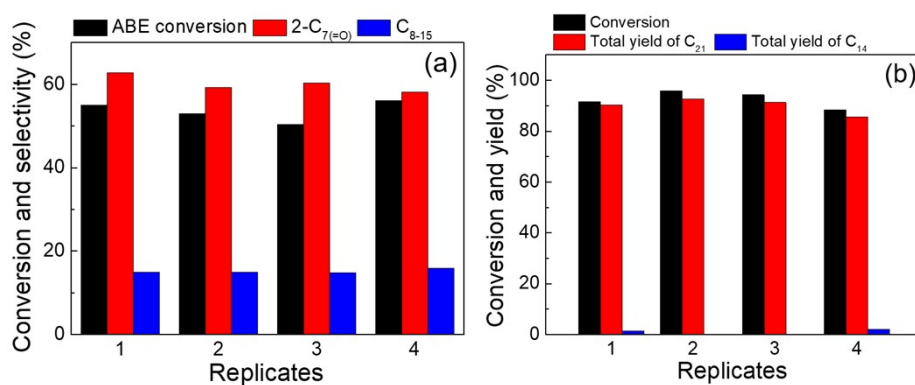

**Fig. S24.** (a) Replicated experiments of the 5 wt% Ni-MgO-SBA-16 catalyst. Reaction conditions: 12.1 wt% water containing ABE mixtures (10 g), dodecane (1 g), catalyst (1 g), reaction temperature (240 °C), and 24 h. (b) Replicated experiments of the  $\gamma$ -Al<sub>2</sub>O<sub>3</sub> catalyst. Reaction conditions: 2-heptanone (1.5 g), heptane (20 g), dodecane (0.3 g),  $\gamma$ -Al<sub>2</sub>O<sub>3</sub> (2 g), anhydrous CaCl<sub>2</sub> (1 g), 2 h, 180 °C.
